# Supplementary material
Source: publisher figshare collection journal article supplement (https://karger.figshare.com/ndownloader/files/23809694)
Supplement: Supplementary file 1 [file 23809694]

**APPENDIX 1**

**CARPREG I predictors for maternal cardiovascular events**

| Prior cardiac event (heart failure, transient ischaemic attack, stroke before pregnancy or arrhythmia)  Baseline functional class NYHA > II or cyanosis  Left heart obstruction  Reduced systemic ventricular systolic function (ejection fraction < 40 %) |
| --- |
| CARPREG I risk score: for each CARPREG predictor that is present a point is assigned.  Risk estimation of cardiovascular maternal complications  0 point 5 %  1 point 27 %  > 1 point 75 % |

**Modified WHO score (mWHO)**

mWHO 1: no increased risk of maternal mortality and no/mild increase in morbidity

mWHO 2: small increased risk of maternal mortality or moderate increase in morbidity

mWHO 3: significantly increased risk of maternal mortality or severe morbidity

mWHO 4: extremely high risk of maternal mortality or severe morbidity; pregnancy contraindicated

**mWHO 1**

| Uncomplicated, small or mild   - Pulmonary stenosis - Ventricular septal defect - Patent ductus arteriosus - Mitral valve prolapse with mid mitral regurgitation   Successfully repaired simple lesions   - Ostium secundum atrial septal defects - Ventricular septal defects - Patent ductus arteriosus - Total anomalous pulmonary venous drainage   Isolated ventricular extrasystoles and atrial ectopic beats |
| --- |

**mWHO 2** (if otherwise well and uncomplicated)

| Unoperated atrial septal defect  Repaired tetralogy of Fallot  Most arrhythmias |
| --- |

**mWHO 2-3** (depending on individual)

| Mild left ventricular impairment  Hypertrophic cardiomyopathy  Native or tissue valve disease, not considered WHO 4  Marfan syndrome without aortic dilatation  Heart transplantation  Aorta < 45 mmin aortic disease associated with bicuspid aortic valve  Repaired coarctation |
| --- |

**mWHO 3 (high risk for maternal morbidity)**

| Mechanical valve  Systemic right ventricle  Post Fontan operation  Cyanotic heart disease  Other complex congenital heart disease  Aortic dilatation 40-45 mm in Marfan syndrome  Aortic dilatation 45-50 mm in aortic disease associated with bicuspid aortic valve |
| --- |

**mWHO 4 (pregnancy not recommended)**

| Pulmonary arterial hypertension of any cause  Severe systemic ventricular dysfunction   - NYHA III-IV or LVEF < 30 %   Previous peripartum cardiomyopathy with any residual impairment of left ventricular function  Severe left heart valve obstruction  Marfan syndrome with aorta dilated > 45 mm  Aortic dilatation > 50 mm in aortic disease associated with bicuspid aortic valve  Native severe coarctation |
| --- |
